# Supplementary material
Source: Elsevier journal article supplement (https://www.sciencedirect.com/science/article/pii/S0300893226000461)
Supplement: mmc1 [file mmc1.pdf]

## MATERIAL ADICIONAL

### ANEXO. LISTA COMPLETA DE INTEGRANTES DE LOS COMITÉS Y GRUPOS DE TRABAJO DE LA PRIMERA FASE DEL PROYECTO PROMCAR

|                                                                                    |                      |
|------------------------------------------------------------------------------------|----------------------|
| Pablo Avanzas Fernández (Hospital Universitario Central de Asturias)               | EAO                  |
| Vivencio Barrios Alonso (Hospital Universitario Ramón y Cajal)                     | FA                   |
| J. Luis Bernal Sobrino (Fundación IMAS)                                            | GA                   |
| Santiago Blanco (paciente)                                                         | SCA, SCC             |
| Ángel Cequier Fillat (Hospital Universitario de Bellvitge)                         | CD, PG, EAO, IC, EX  |
| María Belén Cid Álvarez (Hospital Clínico Universitario de Santiago de Compostela) | EAO                  |
| Concepción Cruzado Álvarez (Hospital Universitario Virgen de la Victoria)          | CD, PG               |
| Francisco Javier Elola Somoza (Fundación IMAS)                                     | CD, PG, FA, SCA, SCC |
| Carlos Escobar Cervantes (Hospital Universitario La Paz)                           | IC                   |
| Mercè Farauo (Hospital de San Juan Despí Moisès Broggi)                            | IC                   |
| Ignacio Fernández Lozano (Hospital Universitario Puerta de Hierro)                 |                      |
| María Rosa Fernández Olmo (Complejo Hospitalario de Jaén)                          | SCC                  |
| Ramón Freixa Pamias (Complex Hospitalari Moisès Broggi)                            | FA                   |
| Rocío García Orta (Hospital Universitario Virgen de las Nieves)                    | CD, PG, EX           |
| Josebe Goirigolzarri Artaza (Hospital Clínico San Carlos)                          | GA                   |
| Teresa Guiberteau Díaz (Hospital Universitario de Cabueñes)                        | EAO                  |
| Rafael Hidalgo Urbano (Hospital Universitario Virgen Macarena)                     | CD, PG, EX           |
| Pablo Holst (ACARMAS)                                                              | EX                   |
| Andrés Íñiguez Romo (Hospital Universitario Álvaro Cunqueiro)                      | CD, PG               |
| Emilio Manuel Muñoz García (ACARMAS)                                               | EX                   |
| Marta Parellada (Hospital Clínic de Barcelona)                                     | SCA                  |
| Laura Pérez Benito (Fundación Casa del Corazón)                                    | GA                   |
| Pablo Jorge Pérez (Hospital Universitario de Canarias)                             | SCA                  |
| Miriam Quintana Giner (Hospital Clínico Universitario Virgen de la Arrixaca)       | SCC                  |
| Sergio Raposeiras Roubín (Hospital Universitario Álvaro Cunqueiro)                 | SCA                  |
| Alejandro Recio Mayoral (Hospital Universitario Virgen Macarena)                   | IC                   |
| José Miguel Rivera Caravaca (IMIB)                                                 | FA                   |
| Luis Rodríguez Padial (Hospital Universitario de Toledo)                           | CD, PG               |
| Inmaculada Román Navarrete (APAM)                                                  | FA                   |
| Nicolás Rosillo Ramírez (Fundación IMAS)                                           | GA                   |
| Martín Ruiz Ortiz (Hospital Universitario Reina Sofía)                             | FA                   |
| María Cecilia Salvador González (AEPOVAC)                                          | EAO                  |
| Maite San Saturnino (Organización de Asociaciones de Pacientes de la FEC)          | CD, PG, EX           |
| Ignacio José Zorrilla Delgado (APAM)                                               | IC                   |

ACARMAS: Asociación Cardiosaludable Madrid Sur; AEPOVAC: Asociación Española de Portadores de Válvulas Cardíacas Anticoagulados y Adultos con Cardiopatías Congénitas; APAM: Asociación de Personas con Diversidad Funcional, Familias y Amigos; CD: comité director; EAO: estenosis aórtica; EX: grupo de PREM; FA: fibrilación auricular; FEC: Fundación Española del Corazón; GA: grupo de apoyo; IC: insuficiencia cardíaca; IMAS: Instituto para la Mejora de la Asistencia Sanitaria; IMIB: Instituto Murciano de Investigación Biosanitaria Pascual Parrilla; PG: grupo de PROM genérico; PREM: datos de la experiencia comunicada por el paciente (*patient-reported experience measures*); PROM: datos de los resultados comunicados por el paciente (*patient-reported outcome measures*); SCA: síndrome coronario agudo; SCC: síndrome coronario crónico.

**Tabla S1**

Síntesis de la evidencia científica consultada

| Revisión              | Objeto                                                                                                                                                                                                                                                                                          | Fuentes consultadas  | Criterios de búsqueda                                                                                                                                                                                                                                                                                                                                                                                                                                                                                                                            | Sintaxis de búsqueda                                                                                                                                                                                                                                                                                                                                                                                                                                                                                                                                                                                                                                                                                                                                                             | Documentos encontrados (n) |
|-----------------------|-------------------------------------------------------------------------------------------------------------------------------------------------------------------------------------------------------------------------------------------------------------------------------------------------|----------------------|--------------------------------------------------------------------------------------------------------------------------------------------------------------------------------------------------------------------------------------------------------------------------------------------------------------------------------------------------------------------------------------------------------------------------------------------------------------------------------------------------------------------------------------------------|----------------------------------------------------------------------------------------------------------------------------------------------------------------------------------------------------------------------------------------------------------------------------------------------------------------------------------------------------------------------------------------------------------------------------------------------------------------------------------------------------------------------------------------------------------------------------------------------------------------------------------------------------------------------------------------------------------------------------------------------------------------------------------|----------------------------|
| Narrativa             | Identificar estudios recientes relevantes para establecer el marco conceptual del proyecto, que se utilizaron para elaborar un documento de síntesis que fue aprobado por el comité director y presentado como referencia teórica a todos los grupos de trabajo en las reuniones de lanzamiento | MEDLINE (vía PubMed) | El criterio de selección se centró en manuales de implementación y revisiones sistemáticas que establecen los marcos operativos para la integración de PROM y PREM en los sistemas de información sanitaria, priorizando la relevancia institucional sobre la exhaustividad bibliográfica                                                                                                                                                                                                                                                        | ((PROM[ti] OR PREM[ti] OR "patient-reported outcome"[ti]) AND ("systematic review"[ti] OR "scoping review"[ti]) AND (methodology[tiab] OR implementation[tiab])) AND ("2020"[dp]: "3000"[dp])                                                                                                                                                                                                                                                                                                                                                                                                                                                                                                                                                                                    | 89                         |
|                       |                                                                                                                                                                                                                                                                                                 | Google Scholar       | Texto libre. El criterio de selección se centró en manuales de implementación y revisiones sistemáticas que establecen los marcos operativos para la integración de PROM y PREM en la práctica clínica hospitalaria y los sistemas de información, priorizando la relevancia institucional sobre la exhaustividad bibliográfica                                                                                                                                                                                                                  | –                                                                                                                                                                                                                                                                                                                                                                                                                                                                                                                                                                                                                                                                                                                                                                                | 4                          |
| De alcance modificada | Identificar cuestionarios de PROM y PREM validados para su aplicación en la atención hospitalaria de pacientes con enfermedades cardiovasculares                                                                                                                                                | MEDLINE (vía PubMed) | <p>Criterios de elegibilidad:</p> <ol style="list-style-type: none"> <li>Inclusión: estudios primarios que evaluaron las propiedades psicométricas de PROM o PREM y cuestionarios específicos. La población objetivo fueron los pacientes adultos con enfermedad cardiovascular</li> <li>Exclusión: revisiones (sistemáticas, metanálisis, narrativas), literatura gris (tesis, resúmenes de conferencias, documentos institucionales), y estudios clínicos que usaran un cuestionario, pero no evaluaran sus propiedades de medición</li> </ol> | ("Patient Reported Outcome Measures"[MeSH] OR "patient-reported outcome"[tiab] OR PROM[tiab] OR "patient-reported experience"[tiab] OR PREM[tiab] OR "patient experience"[tiab] OR "experience measure"[tiab] OR "patient satisfaction"[tiab]) AND ("validation study"[pt] OR validation[tiab] OR validated[tiab] OR psychometric*[tiab] OR reliability[tiab] OR validity[tiab] OR "measurement properties"[tiab] OR "cross-cultural"[tiab] OR "factor analysis"[tiab]) AND ("acute coronary syndrome"[tiab] OR "chronic coronary syndrome"[tiab] OR "coronary artery disease"[tiab] OR "angina"[tiab] OR "myocardial infarction"[tiab] OR "heart failure"[tiab] OR "atrial fibrillation"[tiab] OR "aortic stenosis"[tiab] NOT ("systematic review"[ti] OR "meta-analysis"[ti])) | 196                        |

PREM: medidas de la experiencia comunicada por el paciente (*patient-reported experience measures*); PROM: medidas de los resultados comunicados por el paciente (*patient-reported outcome measures*); SCA: síndrome coronario agudo; SCC: síndrome coronario crónico.

**Tabla S2**

Cuestionarios considerados

| Grupo de trabajo               | Cuestionarios considerados                                                                                                                                                                                                                                                                                                                                                                                                                                                                                                                                                                                                                                                                                                                                                                                                                                                                                                                                                                                                                                                                                                                                                                                      |
|--------------------------------|-----------------------------------------------------------------------------------------------------------------------------------------------------------------------------------------------------------------------------------------------------------------------------------------------------------------------------------------------------------------------------------------------------------------------------------------------------------------------------------------------------------------------------------------------------------------------------------------------------------------------------------------------------------------------------------------------------------------------------------------------------------------------------------------------------------------------------------------------------------------------------------------------------------------------------------------------------------------------------------------------------------------------------------------------------------------------------------------------------------------------------------------------------------------------------------------------------------------|
| <b>Estenosis aórtica grave</b> | <ul style="list-style-type: none"> <li>• <i>Heart Valve Disease Impact on Daily Life</i> (IDCV)<sup>1</sup></li> <li>• <i>Minnesota Living with Heart Failure Questionnaire</i> (MLHFQ)<sup>2</sup></li> <li>• <i>Kansas City Cardiomyopathy Questionnaire</i> (KCCQ)<sup>3</sup></li> <li>• <i>36-Item Short-Form Health Survey</i> (SF-36)<sup>4</sup></li> <li>• <i>EuroQol-5D</i> (EQ-5D)<sup>5</sup></li> </ul>                                                                                                                                                                                                                                                                                                                                                                                                                                                                                                                                                                                                                                                                                                                                                                                            |
| <b>Fibrilación auricular</b>   | <ul style="list-style-type: none"> <li>• <i>Montreal Cognitive Assessment</i> (MoCA)<sup>6</sup></li> <li>• <i>12-Item Short Form Health Survey</i> (SF-12)<sup>7</sup></li> <li>• <i>Patient-Reported Outcomes Measurement Information System Global Health 10-version 1.2</i> (PROMIS GH-10 v.1.2)<sup>8</sup></li> <li>• <i>EuroQol-5D</i> (EQ-5D)<sup>5</sup></li> <li>• <i>WHO Disability Assessment Schedule</i> (WHODAS 2.0)<sup>9</sup></li> <li>• <i>Veterans RAND 12-Item Physical Function Survey</i> (VR-12)<sup>10</sup></li> <li>• <i>Patient Health Questionnaire-2</i> (PHQ-2)<sup>11</sup></li> <li>• <i>PROMIS Cognitive Function</i> (PROMIS-CF)<sup>12</sup></li> <li>• <i>Atrial Fibrillation Effect on Quality-of-Life Questionnaire</i> (AFEQT)<sup>13</sup></li> <li>• <i>University of Toronto Atrial Fibrillation Severity Scale</i> (AFSS)<sup>14</sup></li> <li>• <i>Work Productivity and Activity Impairment Questionnaire: General Health V2.0</i> (WPAI:GH)<sup>15</sup></li> <li>• <i>Arrhythmia-Specific questionnaire in Tachycardia and Arrhythmia</i> (ASTA)<sup>16</sup></li> </ul>                                                                                       |
| <b>Insuficiencia cardiaca</b>  | <ul style="list-style-type: none"> <li>• <i>Kansas City Cardiomyopathy Questionnaire</i> (KCCQ)<sup>3</sup></li> <li>• <i>Shortened Kansas City Cardiomyopathy Questionnaire</i> (KCCQ)<sup>16</sup></li> <li>• <i>Minnesota Living with Heart Failure Questionnaire</i> (MLHFQ)<sup>17</sup></li> <li>• <i>Chronic Heart Failure Questionnaire</i> (CHFQ)<sup>18</sup></li> <li>• <i>Quality of Life Questionnaire in Severe Heart Failure</i> (QLQ-SHF)<sup>19</sup></li> <li>• <i>Chronic Heart Failure Assessment Tool</i> (CHAT)<sup>20</sup></li> <li>• <i>Daily Activity Questionnaire in Heart Failure</i><sup>21</sup></li> <li>• <i>European Heart Self-care Behaviour Scale</i> (EHFScBS)<sup>22</sup></li> <li>• <i>Heart Failure Needs Assessment Questionnaire</i> (HFNAQ)<sup>23</sup></li> <li>• <i>Heart Failure Somatic Perception Scale</i> (HFSPS)<sup>24</sup></li> <li>• <i>Left Ventricular Dysfunction Questionnaire</i> (LVD-36)<sup>25</sup></li> <li>• <i>Shortness of Breath in Heart Failure</i> (SOB-HF)<sup>26</sup></li> <li>• <i>San Diego Heart Failure Questionnaire</i> (SDHF)<sup>27</sup></li> <li>• <i>Self Care Heart Failure Index</i> (SCHFI)<sup>28</sup></li> </ul> |
| <b>SCA/SCC</b>                 | <ul style="list-style-type: none"> <li>• <i>Seattle Angina Questionnaire</i> (SAQ-7)<sup>29</sup></li> <li>• <i>Rose Dyspnea Scale</i><sup>30</sup></li> <li>• <i>Patient Health Questionnaire</i> (PHQ-2)</li> <li>• PROMIS GH-10 v1.2<sup>8</sup></li> <li>• <i>EuroQol-5D</i> (EQ-5D)<sup>5</sup></li> <li>• <i>WHO Disability Assessment Schedule</i> (WHODAS 2.0)<sup>9</sup></li> <li>• <i>Veterans RAND 12-Item Physical Function Survey</i> (VR-12)<sup>10</sup></li> <li>• <i>Kansas City Cardiomyopathy Questionnaire</i> (KCCQ)<sup>3</sup></li> <li>• <i>Minnesota Living with Heart Failure Questionnaire</i> (MLHFQ)<sup>2</sup></li> </ul>                                                                                                                                                                                                                                                                                                                                                                                                                                                                                                                                                       |
| <b>PREM</b>                    | <ul style="list-style-type: none"> <li>• <i>Instrumento de Evaluación de la Experiencia del Paciente Crónico</i> (IEXPAC)<sup>31</sup></li> <li>• <i>Picker Patient Experience Questionnaire</i> (PPE-15)<sup>32</sup></li> <li>• <i>Hospital Consumer Assessment of Healthcare Providers and Systems</i> (HCAHPS)<sup>33</sup></li> <li>• <i>Generic Short Patient Experience Questionnaire</i> (GS-PEQ)<sup>34</sup></li> <li>• <i>Coronary Heart Disease In-patient Experience Questionnaire</i> (I-PEQ (CHD))<sup>35</sup></li> </ul>                                                                                                                                                                                                                                                                                                                                                                                                                                                                                                                                                                                                                                                                       |

PREM: datos de la experiencia comunicada por el paciente (*patient-reported experience measures*); SCA: síndrome coronario agudo; SCC: síndrome coronario crónico.

**Tabla S3**

Matriz de priorización para la selección de PROM genérico

|                                                                      | EQ-5D | SF-36 | DASI | Duke Health Profile | Ferrans and Powers QoLI-Cardiac | Heart QoL Questionnaire | MILQ      | QLICD-CHD | MacNew Heart Disease HRQoL Questionnaire | CDS       | HADS      |           |
|----------------------------------------------------------------------|-------|-------|------|---------------------|---------------------------------|-------------------------|-----------|-----------|------------------------------------------|-----------|-----------|-----------|
| Disponible en español                                                | IMP   | Sí    | Sí   | Sí                  | Sí                              | No                      | Sí        | Sí        | No                                       | Sí        | No        | Sí        |
| Licencia gratuita para uso asistencial                               | IMP   | Sí    | Sí   | Sí                  | No                              | No                      | No        | No        | No                                       | No        | No        | No        |
| Validado en España o en entornos similares                           | IMP   | Sí    | Sí   | Sí                  | Sí                              | No                      | Sí        | Sí        | No                                       | Sí        | No        | Sí        |
| Número de variables                                                  |       | 6     | 8    | 2                   | 3                               | 4                       | 4         | 4         | 4                                        | 3         | 1         | 2         |
| Bienestar físico                                                     | 2     | 2     | 2    | 1                   | 2                               | 2                       | 2         | 2         | 2                                        | 2         |           |           |
| Bienestar emocional                                                  | 2     | 2     | 2    |                     | 2                               | 2                       | 2         | 2         | 2                                        | 2         | 2         | 2         |
| Relaciones interpersonales                                           | 2     |       |      |                     |                                 | 2                       | 2         | 2         |                                          |           |           |           |
| Autonomía y autocuidado                                              | 2     | 2     |      |                     |                                 |                         |           |           |                                          |           |           |           |
| Inclusión social                                                     | 2     |       | 2    |                     | 2                               | 2                       | 2         |           |                                          | 2         |           |           |
| Sencillez (tiempo/esfuerzo para completarlo)                         | 5     | 5     | 1    | 4                   | 4                               | 1                       | 1         | 1         | 1                                        | 2         |           | 3         |
| Disponible en formato digital                                        | 5     | 5     | 5    | 5                   | 5                               | 5                       | 5         | 5         | 5                                        | 5         | 5         | 5         |
| Adecuado para medir los resultados desde la perspectiva del paciente | 10    | 7     | 8    | 4                   | 5                               | 4                       | 6         | 7         | 7                                        | 6         | 2         | 2         |
| Adecuado para medir la calidad asistencial                           | 10    | 8     | 8    | 3                   | 4                               | 6                       | 6         | 6         | 6                                        | 7         | 2         | 2         |
| Consistencia de los modelos conceptuales y de medida                 | 10    | 10    | 10   | 10                  | 10                              | 10                      | 10        | 10        | 10                                       | 10        | 10        | 10        |
| Cumplimiento                                                         |       | Sí    | Sí   | Sí                  | No                              | No                      | No        | No        | No                                       | No        | No        | No        |
| Puntuación total                                                     |       | 41    | 38   | 27                  | No cumple                       | No cumple               | No cumple | No cumple | No cumple                                | No cumple | No cumple | No cumple |

CDS: *Cardiac Depression Scale*; DASI: *Duke Activity Status Index*; EQ-5D: *EuroQoL-5D*; HADS: *Hospital Anxiety and Depression Scale*; HRQoL: *Health-related quality of life*; MILQ: *Multidimensional Index of Life Quality*; PROM: datos de los resultados comunicados por el paciente (*patient-reported outcome measures*); QLICD-CHD: *Quality of Life Instruments for Chronic Diseases-Coronary Heart Disease*; QoL: *Quality of Life*; QoLI: *Quality of Life Index*; SF-36: *36-Item Short-Form Health Survey*.

**Tabla S4**

Catálogo de datos de determinantes sociales de la salud que se deben recopilar junto a la administración de PROM y PREM\*

| <b>Variables</b>                               | <b>Valores posibles</b>                                                                                                                                                                                                                                                                                                                                                                                                                                                                                                                                                                                                                                        |
|------------------------------------------------|----------------------------------------------------------------------------------------------------------------------------------------------------------------------------------------------------------------------------------------------------------------------------------------------------------------------------------------------------------------------------------------------------------------------------------------------------------------------------------------------------------------------------------------------------------------------------------------------------------------------------------------------------------------|
| <b>Sexo</b>                                    | Mujer<br>Varón<br>Otras situaciones                                                                                                                                                                                                                                                                                                                                                                                                                                                                                                                                                                                                                            |
| <b>Orientación sexual</b>                      | Heterosexual<br>Otras                                                                                                                                                                                                                                                                                                                                                                                                                                                                                                                                                                                                                                          |
| <b>Convivencia</b>                             | Vive en pareja<br>Cohabita en comunidad (religiosa/amigos/otros)<br>Vive solo<br>Cohabita con otra unidad familiar<br>Pertenece a una familia monoparental con 1 o más hijos<br>Es el cuidador de otra persona enferma/discapacidad/dependencia<br>Tiene un cuidador<br>Es víctima de violencia de género<br>Otros                                                                                                                                                                                                                                                                                                                                             |
| <b>Entorno medioambiental</b>                  | Municipio rural de pequeño tamaño: población < 5.000 habitantes; integrado en el medio rural<br>Medio rural: población < 30.000 habitantes y densidad < 100 habitantes/km <sup>2</sup><br>Medio no rural: población > 30.000 habitantes                                                                                                                                                                                                                                                                                                                                                                                                                        |
| <b>Situación laboral</b>                       | En activo<br>Sin actividad<br>Pensionista<br>En situación de desempleo                                                                                                                                                                                                                                                                                                                                                                                                                                                                                                                                                                                         |
| <b>Ocupación actual (o la última que tuvo)</b> | Directores/as y gerentes de establecimientos de 10 o más asalariados/as y profesionales tradicionalmente asociados/as a licenciaturas universitarias<br>Directores/as y gerentes de establecimientos con < 10 asalariados/as, profesionales tradicionalmente asociados/as a diplomaturas universitarias y otros/as profesionales de apoyo técnico. Deportistas y artistas<br>Ocupaciones intermedias y trabajadores/as por cuenta propia<br>Supervisores/as y trabajadores/as en ocupaciones técnicas cualificadas<br>Trabajadores/as cualificados/as del sector primario y otros/as trabajadores/as semicualificados/as<br>Trabajadores/as no cualificados/as |
| <b>Nivel educativo</b>                         | No sabe leer ni escribir<br>Educación primaria incompleta (ha asistido < 5 años a la escuela)<br>Educación primaria completa (fue ≥ 5 años a la escuela, pero no llegó al último curso de enseñanza obligatoria)<br>Primera etapa de enseñanza secundaria, con o sin título (2.º curso de la ESO aprobado, EGB o Bachillerato Elemental)<br>Bachillerato<br>Enseñanzas profesionales de grado medio o equivalentes<br>Enseñanzas profesionales de grado superior o equivalentes<br>Estudios universitarios o equivalentes                                                                                                                                      |
| <b>Discapacidad</b>                            | Clase 0. Discapacidad nula: 0-4%<br>Clase 1. Discapacidad leve: 5-24%<br>Clase 2. Discapacidad moderada: 25-49%<br>Clase 3. Discapacidad grave: 50-95%<br>Clase 4. Discapacidad total: 96-100%                                                                                                                                                                                                                                                                                                                                                                                                                                                                 |
| <b>Dependencia</b>                             | Grado I. Dependencia moderada<br>Grado II. Dependencia grave<br>Grado III. Gran dependencia                                                                                                                                                                                                                                                                                                                                                                                                                                                                                                                                                                    |

PROM: datos de la experiencia comunicada por el paciente (*patient-reported experience measures*); PREM: datos de los resultados comunicados por el paciente (*patient-reported outcome measures*).

\*Los PROM aportan una información esencial para evaluar la calidad y efectividad de la asistencia sanitaria. Sin embargo, se sabe que hay otros factores que influyen de forma relevante en la salud, introduciendo un elemento de confusión en la evaluación de los resultados sobre la asistencia sanitaria y en la comparación de estos resultados entre centros sanitarios y servicios de salud. Por este motivo, se recomienda incorporar de forma sistemática la información sobre estos factores a la administración de PROM y PREM en los servicios de cardiología del Sistema Nacional de Salud. Este catálogo comprende un conjunto amplio de variables, que debe tomarse como referencia para las implementaciones locales.

**Tabla S5**

Matriz de priorización para la selección de medidas de resultados comunicadas por el paciente con síndrome coronario agudo

|                                                                      |     | SAQ-7 | RDS | PHQ-2 | PROMIS<br>GH-10 v1.2 | EQ-5D-3L | WHODAS 2.0 | VR-12 | KCCQ | MLHFQ |
|----------------------------------------------------------------------|-----|-------|-----|-------|----------------------|----------|------------|-------|------|-------|
| Disponible en español                                                | IMP | Sí    | Sí  | Sí    | Sí                   | Sí       | Sí         | Sí    | Sí   | Sí    |
| Licencia gratuita para uso asistencial                               | IMP | No    | Sí  | Sí    | Sí                   | Sí       | Sí         | Sí    | No   | No    |
| Validado en España o en entornos similares                           | IMP | No    | No  | Sí    | Sí                   | Sí       | Sí         | No    | No   | No    |
| Número de variables                                                  |     | 2     | 2   | 0     | 2                    | 2        | 0          | 2     | 2    | 2     |
| Bienestar físico                                                     | 2   | 0     | 0   | 2     | 2                    | 2        | 2          | 2     | 2    | 2     |
| Bienestar emocional                                                  | 2   | 0     | 0   | 0     | 2                    | 2        | 2          | 0     | 0    | 2     |
| Relaciones interpersonales                                           | 2   | 2     | 2   | 0     | 0                    | 2        | 2          | 0     | 2    | 0     |
| Autonomía y autocuidado                                              | 2   | 0     | 0   | 0     | 2                    | 2        | 2          | 2     | 0    | 2     |
| Inclusión social                                                     | 2   | 4     | 4   | 2     | 8                    | 10       | 8          | 6     | 6    | 8     |
| Sencillez (tiempo/esfuerzo para completarlo)                         | 5   | 5     | 5   | 5     | 4                    | 4        | 3          | 3     | 4    | 4     |
| Disponible en formato digital                                        | 5   | 10    | 10  | 10    | 10                   | 10       | 10         | 10    | 10   | 10    |
| Adecuado para medir los resultados desde la perspectiva del paciente | 10  | 10    | 0   | 0     | 10                   | 10       | 10         | 10    | 10   | 10    |
| Adecuado para medir la calidad asistencial                           | 10  | 0     | 0   | 0     | 0                    | 10       | 10         | 0     | 0    | 0     |
| Consistencia de los modelos conceptuales y de medida                 | 10  | 10    | 0   | 10    | 10                   | 10       | 10         | 0     | 0    | 0     |
| Cumplimiento                                                         |     | No    | No  | Sí    | Sí                   | Sí       | Sí         | No    | No   | No    |
| Puntuación total                                                     |     | 39    | 19  | 27    | 42                   | 54       | 51         | 29    | 30   | 32    |

EQ-5D: EuroQol-5D; KCCQ: *Kansas City Cardiomyopathy Questionnaire*; MLHFQ: *Minnesota Living with Heart Failure Questionnaire*; PHQ-2: *Patient Health Questionnaire-2*; PROMIS GH-10 v.1.2: *Patient-Reported Outcomes Measurement Information System Global Health 10-version 1.2*; RDS: *Rose Dyspnea Scale*; SAQ-7: *Seattle Angina Questionnaire*; VR-12: *Veterans RAND 12-Item Physical Function Survey*; WHODAS 2.0: *World Health Organization Disability Assessment Schedule*.

**Tabla S6**

Matriz de priorización para la selección de PROM para síndrome coronario crónico

|                                                                      |     | SAQ-7 | RDS | PHQ-2 | PROMIS<br>GH-10 v1.2 | EQ-5D-3L | WHODAS 2.0 | VR-12- | KCCQ | MLHFQ |
|----------------------------------------------------------------------|-----|-------|-----|-------|----------------------|----------|------------|--------|------|-------|
| Disponible en español                                                | IMP | Sí    | Sí  | Sí    | Sí                   | Sí       | Sí         | Sí     | Sí   | Sí    |
| Licencia gratuita para uso asistencial                               | IMP | No    | Sí  | Sí    | Sí                   | Sí       | Sí         | Sí     | No   | No    |
| Validado en España o en entornos similares                           | IMP | No    | No  | Sí    | Sí                   | Sí       | Sí         | No     | No   | No    |
| Número de variables                                                  |     | 2     | 2   | 0     | 2                    | 2        | 0          | 2      | 2    | 2     |
| Bienestar físico                                                     | 2   | 0     | 0   | 2     | 2                    | 2        | 2          | 2      | 2    | 2     |
| Bienestar emocional                                                  | 2   | 0     | 0   | 0     | 2                    | 2        | 2          | 0      | 0    | 2     |
| Relaciones interpersonales                                           | 2   | 2     | 2   | 0     | 0                    | 2        | 2          | 0      | 2    | 0     |
| Autonomía y autocuidado                                              | 2   | 0     | 0   | 0     | 2                    | 2        | 2          | 2      | 0    | 2     |
| Inclusión social                                                     | 2   | 4     | 4   | 2     | 8                    | 10       | 8          | 6      | 6    | 8     |
| Sencillez (tiempo/esfuerzo para completarlo)                         | 5   | 5     | 5   | 5     | 4                    | 4        | 3          | 3      | 4    | 4     |
| Disponible en formato digital                                        | 5   | 10    | 10  | 10    | 10                   | 10       | 10         | 10     | 10   | 10    |
| Adecuado para medir los resultados desde la perspectiva del paciente | 10  | 10    | 0   | 0     | 10                   | 10       | 10         | 10     | 10   | 10    |
| Adecuado para medir la calidad asistencial                           | 10  | 0     | 0   | 0     | 0                    | 10       | 10         | 0      | 0    | 0     |
| Consistencia de los modelos conceptuales y de medida                 | 10  | 10    | 0   | 10    | 10                   | 10       | 10         | 0      | 0    | 0     |
| Cumplimiento                                                         |     | No    | No  | Sí    | Sí                   | Sí       | Sí         | No     | No   | No    |
| Puntuación total                                                     |     | 39    | 19  | 27    | 42                   | 54       | 51         | 29     | 30   | 32    |

EQ-5D: EuroQol-5D; KCCQ: *Kansas City Cardiomyopathy Questionnaire*; MLHFQ: *Minnesota Living with Heart Failure Questionnaire*; PHQ-2: *Patient Health Questionnaire-2*; PROM: datos de los resultados comunicados por el paciente (*patient-reported outcome measures*); PROMIS GH-10 v1.2: *Patient-Reported Outcomes Measurement Information System Global Health 10-version 1.2*; RDS: *Rose Dyspnea Scale*; SAQ-7: *Seattle Angina Questionnaire*; WHODAS 2.0: *World Health Organization Disability Assessment Schedule*.

**Tabla S7**

Matriz de priorización para la selección de PROM para insuficiencia cardíaca

|                                                                      | KCCQ | Shortened KCCQ | MLHQF | CHFQ <sup>a</sup> | QLQ-SHF <sup>b</sup> | CHAT <sup>c</sup> | DAQHF <sup>d</sup> | EHFScBS <sup>e</sup> | HFNAQ <sup>f</sup> | HFSPS <sup>g</sup> | LVD-36 <sup>h</sup> | SOB-HF <sup>i</sup> | SDHF <sup>j</sup> | SCHFI <sup>k</sup> |
|----------------------------------------------------------------------|------|----------------|-------|-------------------|----------------------|-------------------|--------------------|----------------------|--------------------|--------------------|---------------------|---------------------|-------------------|--------------------|
| Disponible en español                                                | IMP  | Sí             | Sí    | Sí                | NV                   | NV                | NV                 | NV                   | NV                 | NV                 | NV                  | NV                  | NV                | NV                 |
| Licencia gratuita para uso asistencial                               | IMP  | No             | No    | No                | NV                   | NV                | NV                 | NV                   | NV                 | NV                 | NV                  | NV                  | NV                | NV                 |
| Validado en España o en entornos similares                           | IMP  | Sí             | Sí    | Sí                | NV                   | NV                | NV                 | NV                   | NV                 | NV                 | NV                  | NV                  | NV                | NV                 |
| Número de variables                                                  |      |                |       |                   | NV                   | NV                | NV                 | NV                   | NV                 | NV                 | NV                  | NV                  | NV                | NV                 |
| Bienestar físico                                                     | 2    | 2              | 2     | 2                 | NV                   | NV                | NV                 | NV                   | NV                 | NV                 | NV                  | NV                  | NV                | NV                 |
| Bienestar emocional                                                  | 2    | 2              | 2     | 2                 | NV                   | NV                | NV                 | NV                   | NV                 | NV                 | NV                  | NV                  | NV                | NV                 |
| Relaciones interpersonales                                           | 2    | 2              | 2     | 2                 | NV                   | NV                | NV                 | NV                   | NV                 | NV                 | NV                  | NV                  | NV                | NV                 |
| Autonomía y autocuidado                                              | 2    | 2              | 0     | 1                 | NV                   | NV                | NV                 | NV                   | NV                 | NV                 | NV                  | NV                  | NV                | NV                 |
| Inclusión social                                                     | 2    | 2              | 2     | 2                 | NV                   | NV                | NV                 | NV                   | NV                 | NV                 | NV                  | NV                  | NV                | NV                 |
| Sencillez (tiempo/esfuerzo para completarlo)                         | 5    | 5              | 5     | 5                 | NV                   | NV                | NV                 | NV                   | NV                 | NV                 | NV                  | NV                  | NV                | NV                 |
| Disponible en formato digital                                        | 5    | 5              | 5     | 5                 | NV                   | NV                | NV                 | NV                   | NV                 | NV                 | NV                  | NV                  | NV                | NV                 |
| Adecuado para medir los resultados desde la perspectiva del paciente | 10   | 0              | 0     | 0                 | NV                   | NV                | NV                 | NV                   | NV                 | NV                 | NV                  | NV                  | NV                | NV                 |
| Adecuado para medir la calidad asistencial                           | 10   | 0              | 0     | 0                 | NV                   | NV                | NV                 | NV                   | NV                 | NV                 | NV                  | NV                  | NV                | NV                 |
| Consistencia de los modelos conceptuales y de medida                 | 10   | 10             | 10    | 10                | NV                   | NV                | NV                 | NV                   | NV                 | NV                 | NV                  | NV                  | NV                | NV                 |
| Cumplimiento                                                         |      | Sí             | No    | Sí                | NV                   | NV                | NV                 | NV                   | NV                 | NV                 | NV                  | NV                  | NV                | NV                 |
| Puntuación total                                                     |      | 30             | 28    | 29                | NV                   | NV                | NV                 | NV                   | NV                 | NV                 | NV                  | NV                  | NV                | NV                 |

CHAT: *Chronic Heart Failure Assessment Tool*; CHFQ: *Chronic Heart Failure Questionnaire*; DAQHF: *Daily Activity Questionnaire in Heart Failure*; EHFScBS: *European Heart Self-care Behaviour Scale*; HFNAQ: *Heart Failure Needs Assessment Questionnaire*; HFSPS: *Heart Failure Somatic Perception Scale*; KCCQ: *Kansas City Cardiomyopathy Questionnaire*; LVD-36: *Left Ventricular Dysfunction Questionnaire*; MLHQF: *Minnesota Living with Heart Failure Questionnaire*; NV: no valorado; PROM: datos de los resultados comunicados por el paciente (*patient-reported outcome measures*); QLQ-SHF: *Quality of Life Questionnaire in Severe Heart Failure*; SCHFI: *Self Care Heart Failure Index*; SDHF: *San Diego Heart Failure Questionnaire*; SOB-HF: *Shortness of Breath in Heart Failure*.

El grupo de trabajo decidió (por unanimidad) no valorar algunos cuestionarios por diferentes motivos:

<sup>a</sup>CHFQ: no cumple ningún requisito considerado imprescindible.

<sup>b</sup>QLQ-SHF: no disponible para su evaluación.

<sup>c</sup>CHAT: no disponible para su evaluación.

<sup>d</sup>DAQHF: no disponible para su evaluación.

<sup>e</sup>EHFScBS: mide el autocuidado.

<sup>f</sup>HFNAQ: no hay información disponible sobre la licencia y está validado en español.

<sup>g</sup>HFSPS: mide síntomas físicos

<sup>h</sup>LVD-36: no están identificados los dominios y está validado en español.

<sup>i</sup>SOB-HF: mide la apnea.

<sup>j</sup>SDHF: mide síntomas físicos.

<sup>k</sup>SCHFI: mide el autocuidado.

**Tabla S8**

Matriz de priorización para la selección de PROM para estenosis aórtica grave

|                                                                      |     | IDCV | KCCQ | MLHFQ | SF-36 | EQ-5D |
|----------------------------------------------------------------------|-----|------|------|-------|-------|-------|
| Disponible en español                                                | IMP | Sí   | Sí   | Sí    | Sí    | Sí    |
| Licencia gratuita para uso asistencial                               | IMP | Sí   | No   | Sí    | Sí    | Sí    |
| Validado en España o en entornos similares                           | IMP | No   | Sí   | Sí    | Sí    | Sí    |
| Número de variables                                                  |     | 6    | 8    | 2     | 8     | 6     |
| Bienestar físico                                                     | 2   | 1    | 2    | 2     | 2     | 2     |
| Bienestar emocional                                                  | 2   | 2    | 1    | 2     | 2     | 2     |
| Relaciones interpersonales                                           | 2   | 1    | 1    | 1     |       |       |
| Autonomía y autocuidado                                              | 2   | 1    | 1    | 1     |       | 2     |
| Inclusión social                                                     | 2   | 1    | 1    | 1     | 2     |       |
| Sencillez (tiempo/esfuerzo para completarlo)                         | 5   | 4    | 5    | 4     | 1     | 5     |
| Disponible en formato digital                                        | 5   | 5    | 5    | 5     | 5     | 5     |
| Adecuado para medir los resultados desde la perspectiva del paciente | 10  | 8    | 8    | 7     | 8     | 7     |
| Adecuado para medir la calidad asistencial                           | 10  | 7    | 10   | 8     | 8     | 8     |
| Consistencia de los modelos conceptuales y de medida                 | 10  | 8    | 8    | 8     | 10    | 10    |
| Cumplimiento                                                         |     | No   | Sí   | Sí    | Sí    | Sí    |
| Puntuación total                                                     |     | 38   | 42   | 39    | 38    | 41    |

EQ-5D: EuroQol-5D; IDCV: *Heart Valve Disease Impact on Daily Life*; MLHFQ: *Minnesota Living with Heart Failure Questionnaire*; KCCQ: *Kansas City Cardiomyopathy Questionnaire*; PROM: datos de los resultados comunicados por el paciente (*patient-reported outcome measures*); SF-36: *36-Item Short-Form Health Survey*.

**Tabla S9**

Matriz de priorización para la selección de PROM para fibrilación auricular

|                                                                      |     | MoCA | SF-12 | PROMIS<br>GH-10 v1.2 | EQ-5D-3L | WHODAS<br>2.0 | VR-12 | PHQ-2 | PROMIS-CF | AFEQT | University of<br>Toronto AFSS | WPAI:GH | ASTA |
|----------------------------------------------------------------------|-----|------|-------|----------------------|----------|---------------|-------|-------|-----------|-------|-------------------------------|---------|------|
| Disponible en español                                                | IMP | Si   | Si    | Si                   | Si       | Si            | Si    | Si    | Si        | Si    | No                            | Si      | Si   |
| Licencia gratuita para uso asistencial                               | IMP | No   | Si    | Si                   | Si       | Si            | Si    | Si    | Si        | Si    | No                            | Si      | Si   |
| Validado en España o en entornos similares                           | IMP | Si   | Si    | No                   | Si       | Si            | No    | Si    | No        | No    | No                            | No      | Si   |
| Número de variables                                                  |     | 0    | 2     | 2                    | 2        | 2             | 2     | 0     | 0         | 2     | 2                             | 2       | 2    |
| Bienestar físico                                                     | 2   | 0    | 2     | 2                    | 2        | 2             | 2     | 2     | 0         | 2     | 0                             | 0       | 2    |
| Bienestar emocional                                                  | 2   | 0    | 2     | 2                    | 2        | 2             | 0     | 0     | 0         | 0     | 0                             | 0       | 2    |
| Relaciones interpersonales                                           | 2   | 0    | 0     | 0                    | 2        | 2             | 0     | 0     | 0         | 2     | 2                             | 0       | 2    |
| Autonomía y autocuidado                                              | 2   | 0    | 2     | 2                    | 2        | 2             | 2     | 0     | 0         | 0     | 0                             | 2       | 2    |
| Inclusión social                                                     | 2   | 0    | 8     | 8                    | 10       | 10            | 6     | 2     | 0         | 6     | 4                             | 4       | 10   |
| Sencillez (tiempo/esfuerzo para completarlo)                         | 5   | 4    | 5     | 4                    | 4        | 4             | 3     | 5     | 4         | 4     | 3                             | 4       | 5    |
| Disponible en formato digital                                        | 5   | 10   | 10    | 10                   | 10       | 10            | 10    | 10    | 10        | 10    | 0                             | 10      | 10   |
| Adecuado para medir los resultados desde la perspectiva del paciente | 10  | 0    | 10    | 10                   | 10       | 10            | 10    | 0     | 10        | 10    | 10                            | 10      | 10   |
| Adecuado para medir la calidad asistencial                           | 10  | 0    | 0     | 0                    | 10       | 10            | 0     | 0     | 0         | 10    | 10                            | 0       | 10   |
| Consistencia de los modelos conceptuales y de medida                 | 10  | 10   | 0     | 10                   | 10       | 0             | 0     | 10    | 0         | 10    | 10                            | 0       | 10   |
| Cumplimiento                                                         |     | No   | Sí    | No                   | Sí       | Sí            | No    | Sí    | No        | No    | No                            | No      | Sí   |
| Puntuación total                                                     |     | 24   | 33    | 42                   | 54       | 44            | 29    | 27    | 24        | 50    | 37                            | 28      | 55   |

AFEQT: Atrial Fibrillation Effect on Quality-of Life Questionnaire; AFSS: Atrial Fibrillation Severity Scale; ASTA: Arrhythmia-Specific questionnaire in Tachycardia and Arrhythmia; EQ-5D: EuroQol-5D; MoCA: Montreal Cognitive Assessment; PHQ-2: Patient Health Questionnaire-2; PROM: datos de los resultados comunicados por el paciente (patient-reported outcome measures); PROMIS: Patient-Reported Outcomes Measurement Information System; PROMIS-CF: PROMIS Cognitive Function; PROMIS GH-10 v.1.2: Patient-Reported Outcomes Measurement Information System Global Health 10-version 1.2; SF-12: 12-Item Short Form Health Survey; VR-12: Veterans RAND 12-Item Physical Function Survey; WHODAS 2.0: World Health Organization Disability Assessment Schedule; WPAI:GH 2.0: Work Productivity and Activity Impairment Questionnaire: General Health V2.0.

**Tabla S10**

Matriz de priorización para la selección de PREM

|                                                                      |     | IEXPAC | PPE-15 | HCAHPS | GS-PEQ | I-PEQ (CHD) |
|----------------------------------------------------------------------|-----|--------|--------|--------|--------|-------------|
| Disponible en español                                                | IMP | Sí     | Sí     | No     | No     | No          |
| Licencia gratuita para uso asistencial                               | IMP | Sí     | Sí     | Sí     | Sí     | Sí          |
| Validado en España o en entornos similares                           | IMP | Sí     | Sí     | No     | No     | No          |
| Número de variables                                                  |     | 3      | 8      | 9      | 7      | 7           |
| Respeto y dignidad                                                   | 2   | 1      | 2      | 2      | 0      | 2           |
| Apoyo emocional                                                      | 2   | 2      | 2      | 0      | 0      | 2           |
| Comunicación efectiva                                                | 2   | 2      | 2      | 2      | 2      | 2           |
| Participación en las decisiones                                      | 2   | 2      | 2      | 0      | 2      | 2           |
| Continuidad de la atención                                           | 2   | 2      | 2      | 2      | 0      | 2           |
| Acceso a la información                                              | 2   | 2      | 2      | 2      | 0      | 2           |
| Gestión de quejas y sugerencias                                      | 2   | 2      | 2      | 2      | 2      | 2           |
| Sencillez (tiempo/esfuerzo para completarlo)                         | 5   | 5      | 5      | 3      | 5      | 2           |
| Disponible en formato digital                                        | 5   | 5      | 0      | 5      |        |             |
| Adecuado para medir los resultados desde la perspectiva del paciente | 10  | 10     | 8      | 0      |        |             |
| Adecuado para medir la calidad asistencial                           | 10  | –      | –      | 0      | 0      | –           |
| Consistencia de los modelos conceptuales y de medida                 | 10  | 10     | 10     | 0      | 0      | 3           |
| Cumplimiento                                                         |     | Sí     | Sí     | No     | No     | No          |
| Puntuación total                                                     |     | 43     | 37     | 18     | 11     | 19          |

GS-PEQ: *Generic Short Patient Experiences Questionnaire*; HCAHPS: *Hospital Consumer Assessment of Healthcare Providers and Systems*; IEXPAC: Instrumento de Evaluación de la Experiencia del Paciente Crónico; I-PEQ (CHD): *Coronary Heart Disease in-Patient Experience Questionnaire*; PPE-15: *Picker Patient Experience Questionnaire-15*; Tabla Tabla PREM: datos de la experiencia comunicada por el paciente (*patient-reported experience measures*).

## BIBLIOGRAFÍA DEL MATERIAL ADICIONAL

1. Padilha KM, Gallani MC, Colombo RC. Validity of an instrument to measure the impact of valve heart disease on the patient's daily life. *J Clin Nurs*. 2007;16:1285-1291.
2. Gordon HG. Measurement of Health-Related Quality of Life in Heart Failure. *J Am Coll Cardiol*. 1993;22:185-191.
3. Green CP, Porter CB, Bresnahan DR, Spertus JA. Development and evaluation of the Kansas City Cardiomyopathy Questionnaire: a new health status measure for heart failure. *J Am Coll Cardiol*. 2000;35:1245-1255.
4. Alonso J, Prieto L, Antó JM. El Cuestionario de Salud SF-36 español: una década de experiencia y nuevos desarrollos. *Gac Sanit*. 1995;9:20-25.
5. Badia X, Roset M, Montserrat S, et al. El EuroQol-5D: una alternativa sencilla para la medición de la calidad de vida relacionada con la salud en atención primaria. *Aten Primaria*. 1999;24:335-342.
6. Nasreddine ZS, Phillips NA, Bédirian V, et al. The Montreal cognitive assessment, MoCA: a brief screening tool for mild cognitive impairment. *J Am Geriatr Soc*. 2005;53:695-699.
7. Ware J Jr, Kosinski M, Keller SD. A 12-Item Short-Form Health Survey: construction of scales and preliminary tests of reliability and validity. *Med Care*. 1996;34:220-233.
8. Hays RD, Bjorner JB, Revicki DA, et al. Development of physical and mental health summary scores from the patient-reported outcomes measurement information system (PROMIS) global items. *Qual Life Res*. 2009;18:873-880.
9. Marx BP, Wolf EJ, Cornette MM, et al. Using the WHODAS 2.0 to assess functioning among veterans seeking compensation for Posttraumatic Stress Disorder. *Psychiatr Serv*. 2015;66:1312-1317.
10. Hays RD, Sherbourne CD, Mazel RM. The RAND 36-item health survey 1.0. *Health Econ*. 1993;2:217-227.
11. Kroenke K, Spitzer RL, Williams JB. The Patient Health Questionnaire-2: validity of a two-item depression screener. *Med Care*. 2003;41:1284-1292.
12. Lai JS, Wagner LI, Jacobsen PB, Cella D. Self-reported cognitive concerns and abilities: two sides of one coin? *Psychooncology*. 2014;23:1133-1141.
13. Spertus J, Dorian P, Bubien R, et al. Development and validation of the Atrial Fibrillation Effect on Quality-of-Life (AFEQT) Questionnaire in patients with atrial fibrillation. *Circ Arrhythm Electrophysiol*. 2011;4:15-25.
14. Maglio C, Sra J, Paquette M, et al. Measuring quality of life and symptom severity in patients with atrial fibrillation. *PACE*. 1998;21:839.
15. Reilly MC, Zbrozek AS, Dukes EM. The validity and reproducibility of a work productivity and activity impairment instrument. *Pharmacoeconomics*. 1993;4:353-365.
16. Walfridsson U, Arestedt K, Stromberg A. Development and validation of a new Arrhythmia-Specific questionnaire in Tachycardia and Arrhythmia (ASTA) with focus on symptom burden. *Health Qual Life Outcomes*. 2012;10:44.
17. Spertus JA, Jones PG. Development and Validation of a Short Version of the Kansas City Cardiomyopathy Questionnaire. *Circ Cardiovasc Qual Outcomes*. 2015;8:469-476.
18. Khajavi A, Moshki M, Minaee S, et al. Chronic heart failure health-related quality of life questionnaire (CHFQOLQ-20): development and psychometric properties. *BMC Cardiovasc Disord*. 2023;23:165.
19. Garin Boronat O. Measuring health related quality of life in heart failure. Barcelona: Universitat Pompeu Fabra; 2013. Disponible en: <https://www.tdx.cat/handle/10803/123573>.

20. Dunderdale K, Thompson DR, Beer SF, Furze G, Miles JNV. Development and validation of a patient-centered health related quality-of-life measure: the chronic heart failure assessment tool. *J Cardiovasc Nurs*. 2008;23:364-370.
21. Garet M, Degache F, Costes F, et al. DAQIHF: methodology and validation of a daily activity questionnaire in heart failure. *Med Sci Sports Exerc*. 2004;36:1275-1282.
22. Gonzalez B, Lupon L, Parajon T, Urrutia A, Herreros J, Valle V. Use of the European Heart Failure Self-care Behaviour Scale (EHFScBS) in a heart failure unit in Spain. *Rev Esp Cardiol*. 2006;59:166-170.
23. Davidson PM, Cockburn J, Newton PJ. Unmet needs following hospitalization with heart failure: implications for clinical assessment and program planning. *J Cardiovasc Nurs*. 2008;23:541-546.
24. Antonio-Oriola R, Juárez-Vela R, Czapla M, et al. Spanish version of the Heart Failure Somatic Perception Scale (HFSPS v.3) - psychometric properties. *Front Cardiovasc Med*. 2023;10:1242057.
25. O'Leary CJ, Jones PW. The left ventricular dysfunction questionnaire (LVD-36): reliability, validity and responsiveness. *Heart*. 2000;83:634-640.
26. Ekman I, Granger B, Swedberg K, et al. Measuring shortness of breath in heart failure (SOB-HF): Development and validation of a new dyspnoea assessment tool. *Eur J Heart Failure*. 2011;13:838-845.
27. Tate CW, Robertson AD, Zolty R, et al. Quality of life and prognosis in heart failure: results of the Beta-Blocker Evaluation of Survival Trial (BEST). *J Cardiac Failure*. 2007;13:732-737.
28. Juárez-Vela R, Durante A, Antonio-Oriola R, et al. Transcultural Adaptation and Theoretical Models of Validation of the Spanish Version of the Self-Care of Heart Failure Index Version 6.2 (SCHFI v.6.2). *Int J Environ Res Public Health*. 2021;18:569.
29. Spertus JA, Winder JA, Dewhurst TA, et al. Development and evaluation of the Seattle Angina Questionnaire: a new functional status measure for coronary artery disease. *J Am Coll Cardiol*. 1995;25:333-341.
30. Rose GA, Blackburn H. Cardiovascular survey methods. *Monogr Ser World Health Organ*. 1968;56:1-188.
31. Mira JJ, Nuño-Solinís R, Guilabert-Mora M, et al. Development and Validation of an Instrument for Assessing Patient Experience of Chronic Illness Care. *Int J Integr Care*. 2016;16:13.
32. Jenkinson C, Coulter A, Bruster S. The Picker Patient Experience Questionnaire: development and validation using data from in-patient surveys in five countries. *Int J Qual Health Care*. 2002;14:353-358.
33. Centers for Medicare and Medicaid Services. HCAHPS: Patients' Perspectives of Care Survey. Baltimore: CMS; 2003. Disponible en: [https://www.cms.gov/medicare/quality-initiatives-patient-assessment-instruments/hospitalqualityinits/downloads/hospital3state\\_pilot\\_analysis\\_final200512.pdf](https://www.cms.gov/medicare/quality-initiatives-patient-assessment-instruments/hospitalqualityinits/downloads/hospital3state_pilot_analysis_final200512.pdf).
34. Sjetne IS, Bjertnaes OA, Olsen RV, et al. The Generic Short Patient Experiences Questionnaire (GS-PEQ): identification of core items from a survey in Norway. *BMC Health Serv Res*. 2011;11:88.
35. Jenkinson C, Coulter A, Bruster S, et al. The coronary heart disease in-patient experience questionnaire (I-PEQ (CHD)): results from the survey of National Health Service patients. *Qual Life Res*. 2002;11:721-727.
